# Supplementary material for: Defining the plasmonic cavity performance based on mode transitions to realize highly efficient device design
Source: Royal Society of Chemistry journal article supplement (doi:10.1039/d0ma00111b), 2020-01-01
Supplement: d0ma00111b1.pdf [file d0ma00111b1.pdf]

**(Electronic Supplementary Information)**

**Defining plasmonic cavity performance based on mode transitions to realize highly efficient device design**

Vasanthan Devaraj,<sup>a</sup> Jong-Min Lee,<sup>a</sup> Donghan Lee, <sup>\*b</sup> and Jin-Woo Oh <sup>\*ac</sup>

<sup>a</sup>Research Center for Energy Convergence and Technology Division, Pusan National University, Busan 46241, South Korea

<sup>b</sup>Department of Physics, Chungnam National University, Daejeon 34134, South Korea

<sup>c</sup>Department of Nanoenergy Engineering, Pusan National University, Busan 46241, South Korea

\*Corresponding authors. E-mail: [dleee@cnu.ac.kr](mailto:dleee@cnu.ac.kr), [ojw@pusan.ac.kr](mailto:ojw@pusan.ac.kr)

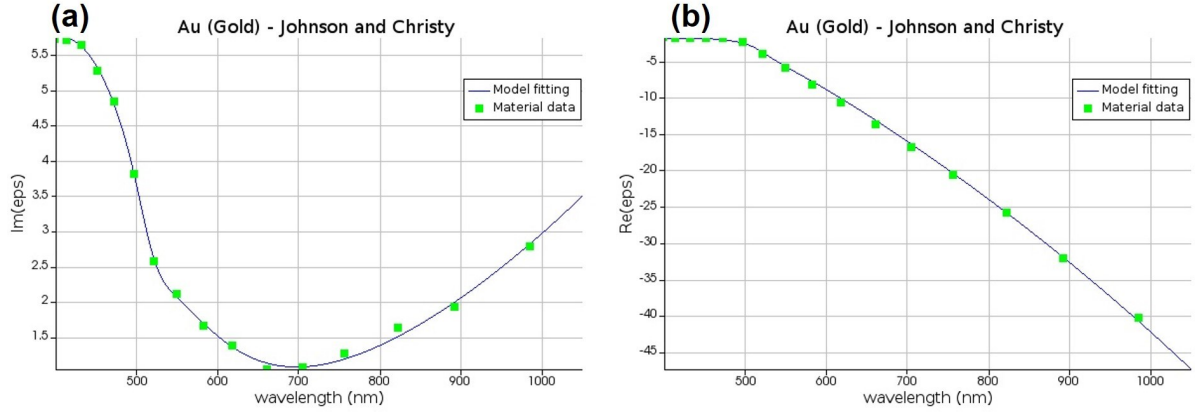

**Figure S1.** Fitted imaginary (a) and real (b) part of permittivity of gold used in the simulation. The refractive index data base employed is Johnson and Christy.

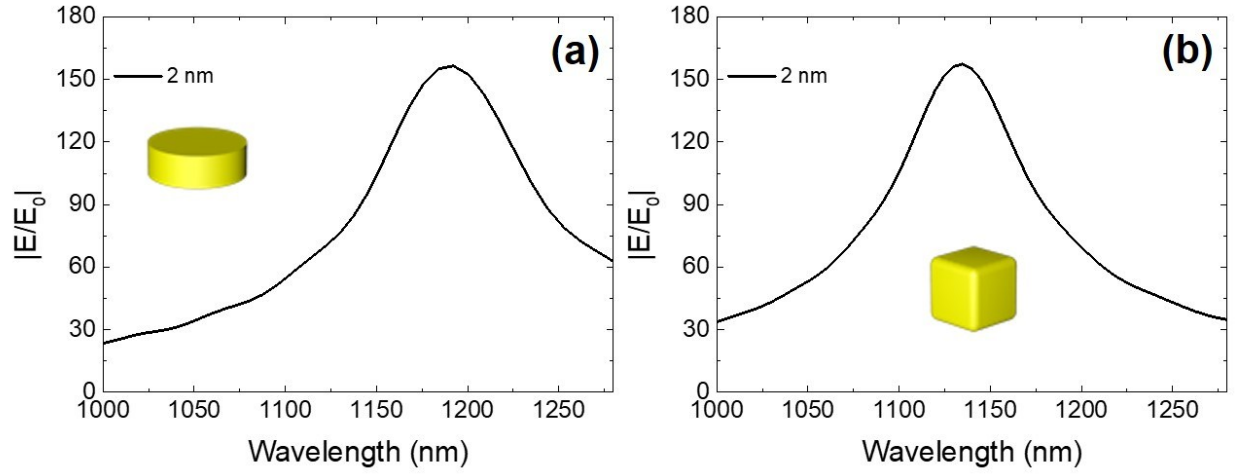

**Figure S2.** Broadband near-field enhancement spectra for disk- (a) and cube- (b) based NPOM structures with  $t = 2$  nm, covering  $|E/E_0| \lambda > 1 \mu\text{m}$ .

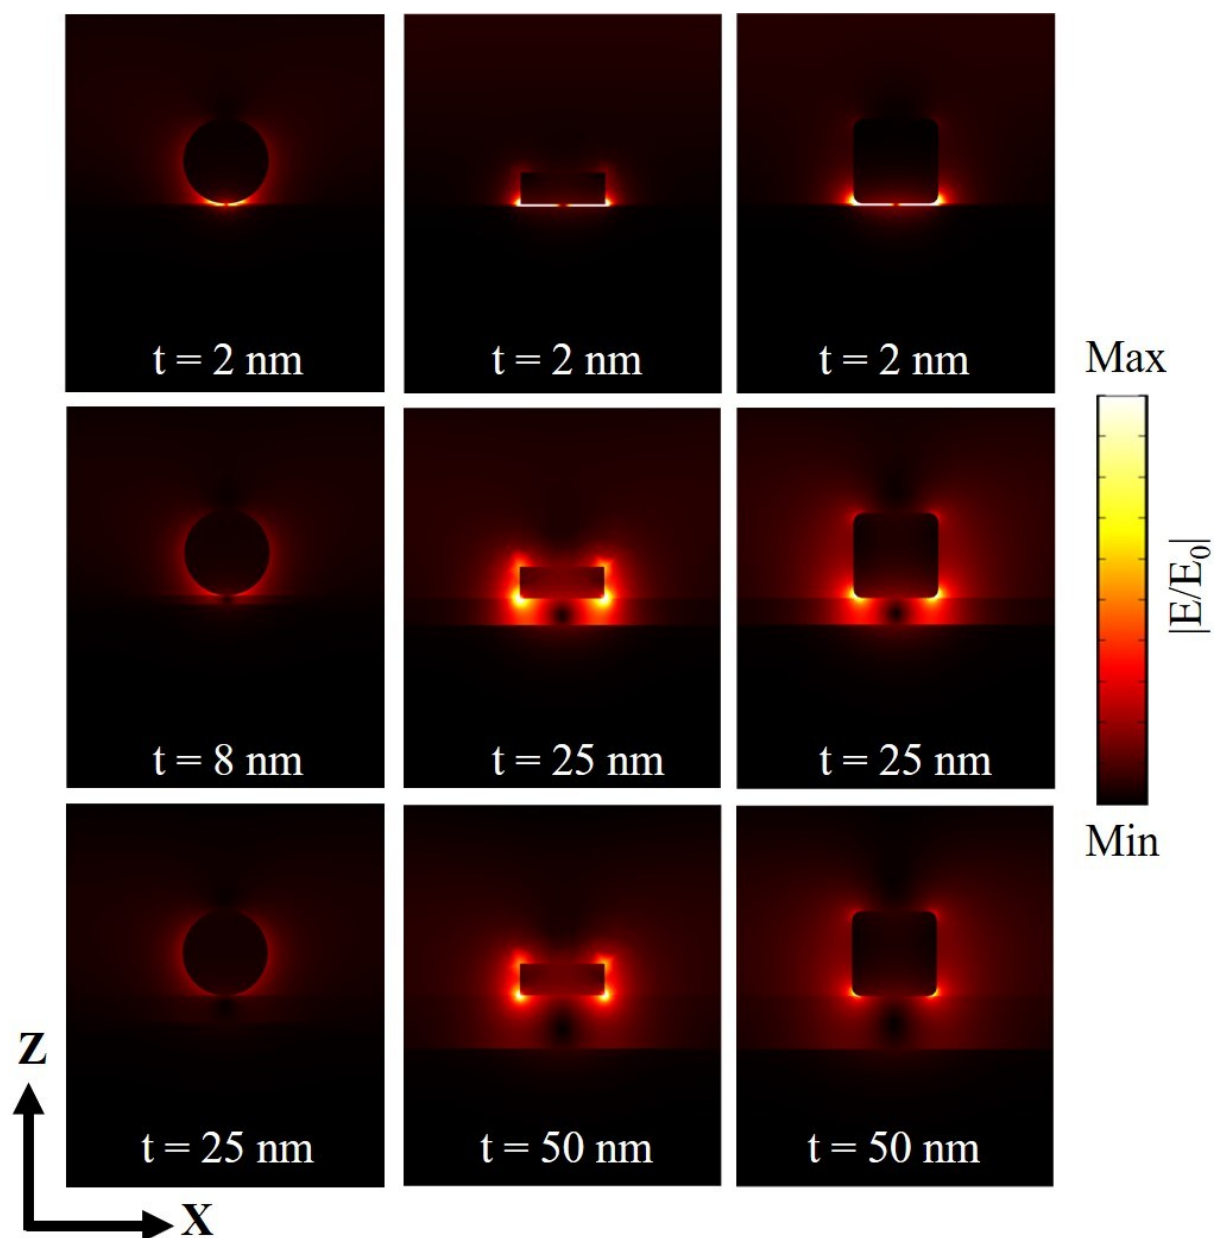

**Figure S3.** Cross-sectional XZ electric field amplitude profiles for the sphere-, disk-, and cube-based NPOM plasmonic nanostructures, extracted from different classifications of plasmonic nanocavity strength, as described in Figure 3.

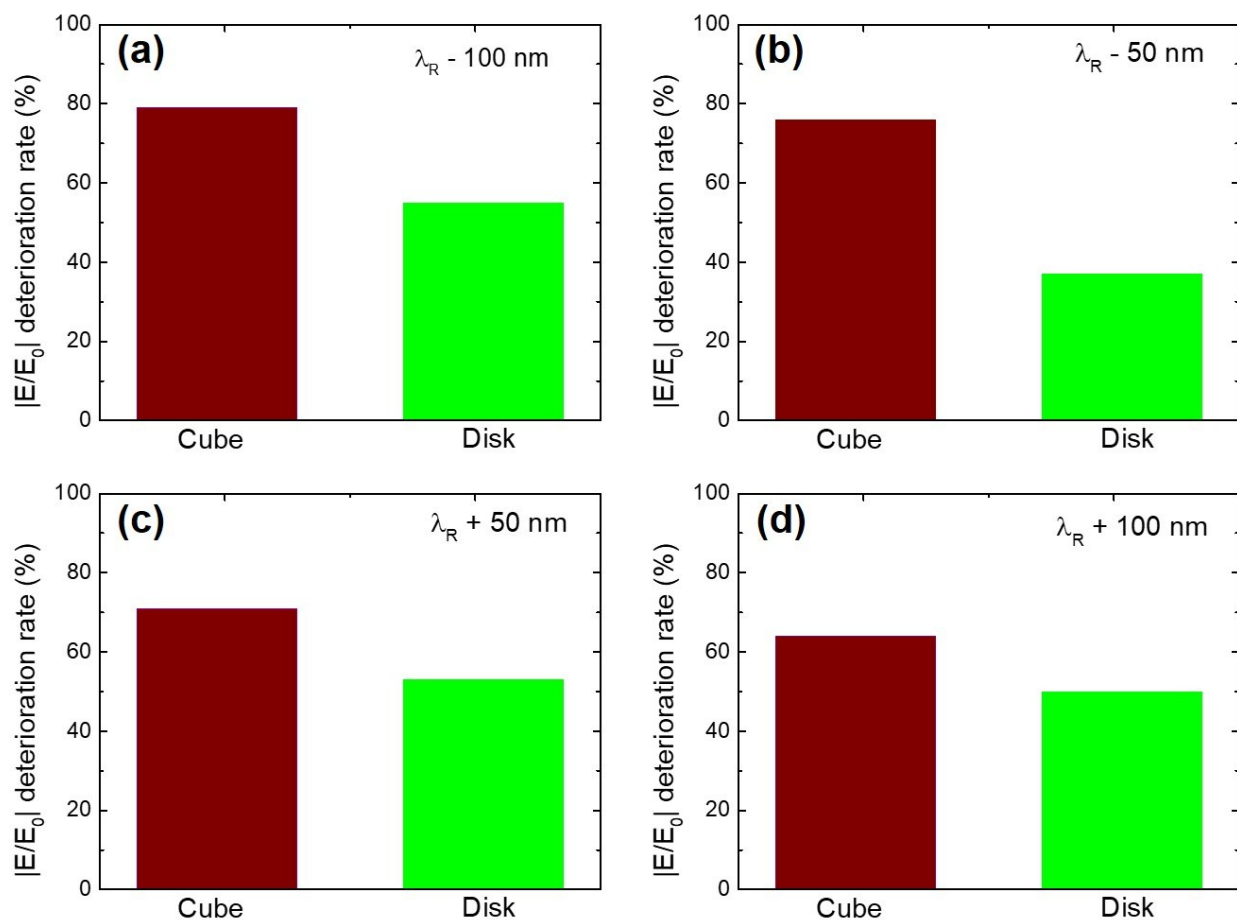

**Figure S4.**  $|E/E_0|$  deterioration rate % for cube- and disk- NPOMs within  $\pm 100$  nm range from its resonance position ( $\lambda_R$ ). Better results with disk NPOM is observed due to its slower deterioration rate %.

**Calculation of the  $|E/E_0|$  deterioration rate %:**

The rate at which  $|E/E_0|$  deteriorated, starting from the simulated minimum  $t$  to the maximum  $t$  condition with respect to the obtained highest  $|E/E_0|$  (here at  $t = 2$  nm), is reported here as the deterioration rate %. For example, consider the sphere NPOM results: at  $t = 2$  nm, the maximum  $|E/E_0| = 92$ . At  $t = 25$  nm (in the case of the disk or cube, this value is 50 nm), and the maximum  $|E/E_0| = 14$ . Thus  $|E/E_0|$  difference = 78.

$$\begin{aligned} |E/E_0| \text{ deterioration rate \%} &= \frac{|E/E_0| \text{ difference}}{\text{Highest } |E/E_0|} * 100 \\ &= \frac{78}{92} * 100 \\ &= 84.8 \% = \sim 85\% \end{aligned}$$
